# Supplementary material for: Study of Pathogenesis Using Fluorescent Strain of Cordyceps farinosa Revealed Infection of Thitarodes armoricanus Larvae via Digestive Tract
Source: MDPI journal article supplement (doi:10.3390/insects13111039), 2022-11-10
Supplement: s1 [file s1]

**Table S1.** Sequences of oligonucleotide primers used in this study

| Name             | Sequence (5'-3')                                             |
|------------------|--------------------------------------------------------------|
| GAPDH-F          | ATGTCCCCCGTCAAGGTTGG                                         |
| GAPDH-R          | TCATCCTATTGGAAGCGTCG                                         |
| PgapIf-F(EcoRI)  | <u>ATGTTGGGCCCCGGCGCGCC</u> gaattcTTTGTGCTGATAGCGATGCCGGATGA |
| PgapIf-R         | <u>CTCGCCCTTGCTCACCAT</u> GGTGTTTATTGATTAGAAAGGT             |
| EGFP-F           | <u>ACCTTTCTAATCAATAAAACA</u> ATGGTGAGCAAGGGCGAG              |
| EGFP-R           | <u>ACGTTAAGTGGATCCCCGGT</u> ACTTGTACAGCTCGTC                 |
| TtrpC-F          | <u>GACGAGCTGTACAAGTAA</u> CCGGGATCCACTTAACGTTACTG            |
| TtrpC-R(HindIII) | <u>CACATTCTGCGGCCT</u> aagcttAAGAAGGATTACCTCTAA              |
| Bar-F            | ATGAGCCCAGAACGACGC                                           |
| Bar-R            | CCCGTCACCGAGATCTGA                                           |
| Tar-1-F          | AAAGGGTCTGTGCTTGTATGGG                                       |
| Tar-1-R          | CGTTGACGGGAATCTGGAA                                          |

The sequences with lowercase letters, gaattc and aagctt indicate *Eco*RI and *Hind*III restriction sites, respectively.

The sequences with underlined letters indicate homology arm sequences.
