# Supplementary material for: Study of Pathogenesis Using Fluorescent Strain of Cordyceps farinosa Revealed Infection of Thitarodes armoricanus Larvae via Digestive Tract
Source: MDPI journal article supplement (doi:10.3390/insects13111039), 2022-11-10
Supplement: s1 [file s1]

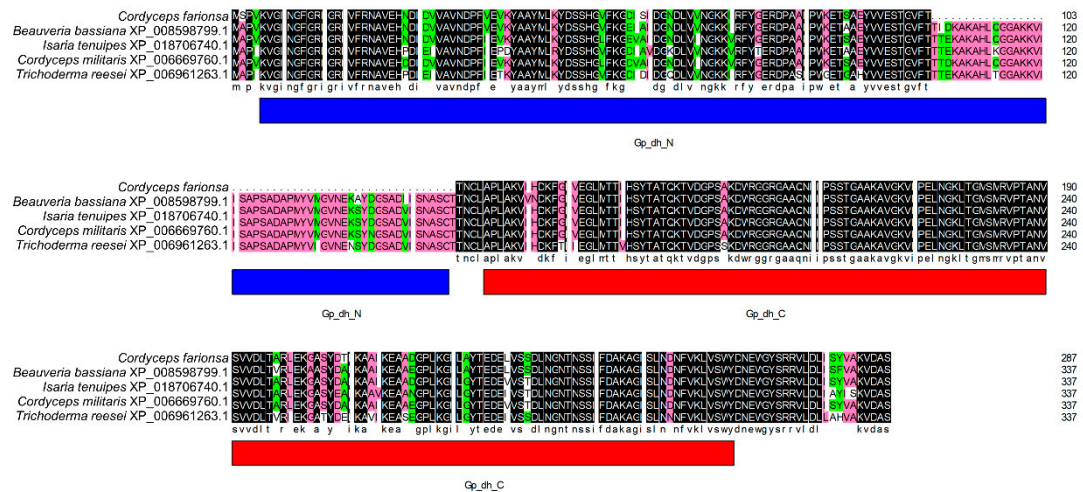

**Figure S1.** Homologous alignment result of GAPDH between *Cordyceps farinosa* and other fungi. The sequence with dark background is 100% homologous, the sequence with green background is  $\geq 75$  homologous, and the sequence with pink background is  $\geq 50$  homologous. The blue and red regions below the sequence represent the conservative N-terminal and C-terminal domains of GAPDH, respectively.
